# Supplementary material for: Population-Based Clinical Cancer Registration in Germany
Source: MDPI journal article supplement (doi:10.3390/cancers15153934), 2023-08-02
Supplement: s1 [file s1]

**Supplementary Material**

Table S1: Most common cancer sites (ICD-10) in Germany 2015 to 2019: age-standardized rates per 100,000 (ASR World)

Data source: common data set of German cancer registries provided by the Centre for Cancer Registry Data at the Robert Koch-Institute, 2023

| Cancer site                    | Women |       |       |       |       | Men   |       |       |       |       |
|--------------------------------|-------|-------|-------|-------|-------|-------|-------|-------|-------|-------|
|                                | 2015  | 2016  | 2017  | 2018  | 2019  | 2015  | 2016  | 2017  | 2018  | 2019  |
| Oral cavity, pharynx (C00-C14) | 4.6   | 4.4   | 4.6   | 4.7   | 4.6   | 12.6  | 12.5  | 12.3  | 11.9  | 11.5  |
| Oesophagus (C15)               | 1.5   | 1.5   | 1.5   | 1.5   | 1.5   | 6.5   | 6.6   | 6.3   | 6.1   | 6.3   |
| Stomach (C16)                  | 5.1   | 4.9   | 5.2   | 4.8   | 4.8   | 10.1  | 9.8   | 9.9   | 9.7   | 9.4   |
| Colo-rectal (C18-C20)          | 22.4  | 22.0  | 23.0  | 23.1  | 22.1  | 35.6  | 34.6  | 34.9  | 35.3  | 34.3  |
| Pancreas (C25)                 | 7.2   | 7.3   | 7.4   | 7.2   | 7.3   | 9.7   | 9.9   | 9.6   | 9.8   | 9.6   |
| Lung (C34)                     | 21.6  | 21.7  | 22.1  | 22.1  | 22.5  | 39.5  | 38.6  | 38.1  | 37.2  | 36.0  |
| Melanoma (C43)                 | 15.5  | 15.4  | 14.9  | 14.6  | 14.1  | 14.8  | 14.7  | 14.4  | 14.6  | 14.4  |
| Breast (C50)                   | 86.3  | 85.3  | 84.8  | 85.6  | 86.2  | 0.8   | 0.8   | 0.7   | 0.7   | 0.8   |
| Cervix uteri (C53)             | 7.3   | 7.2   | 7.3   | 7.2   | 7.2   | -     | -     | -     | -     | -     |
| Corpus uteri (C54-C55)         | 11.4  | 11.4  | 11.5  | 11.6  | 11.6  | -     | -     | -     | -     | -     |
| Ovary (C56)                    | 8.5   | 8.0   | 8.0   | 8.0   | 7.6   | -     | -     | -     | -     | -     |
| Prostate (C61)                 | -     | -     | -     | -     | -     | 61.3  | 63.0  | 66.0  | 67.3  | 70.0  |
| Testis (C62)                   | -     | -     | -     | -     | -     | 9.3   | 9.0   | 8.8   | 9.4   | 9.3   |
| Kidney (C64)                   | 5.3   | 5.3   | 4.9   | 5.0   | 4.6   | 11.6  | 11.1  | 11.0  | 10.8  | 10.9  |
| Bladder (C67)                  | 3.4   | 3.5   | 3.6   | 3.5   | 3.5   | 12.4  | 12.3  | 12.2  | 12.4  | 12.2  |
| Brain (C70–C72)                | 4.6   | 4.7   | 4.3   | 4.2   | 4.0   | 6.1   | 6.1   | 5.7   | 5.8   | 5.5   |
| Thyroid gland (C73)            | 8.2   | 8.2   | 8.1   | 7.6   | 7.3   | 3.2   | 3.3   | 3.2   | 3.0   | 3.0   |
| Hodgkin lymphoma (C81)         | 2.3   | 2.0   | 2.1   | 2.2   | 2.3   | 2.7   | 2.8   | 2.8   | 2.8   | 2.7   |
| Non-Hodgkin lym. (C82-C88)     | 7.9   | 8.0   | 8.0   | 7.9   | 7.7   | 11.6  | 11.6  | 11.6  | 11.2  | 11.3  |
| Multiple myeloma (C90)         | 2.7   | 2.6   | 2.7   | 2.5   | 2.5   | 4.1   | 4.2   | 4.1   | 3.9   | 3.9   |
| Leukaemia (C91-C95)            | 6.2   | 6.1   | 5.8   | 5.4   | 5.2   | 9.9   | 9.5   | 9.3   | 8.8   | 8.5   |
| All sites excluding C44        | 255.1 | 252.0 | 252.3 | 251.4 | 249.0 | 295.2 | 292.8 | 292.6 | 292.4 | 290.3 |
